# Supplementary material for: Radial gradient and radial deviation radiomic features from pre-surgical CT scans are associated with survival among lung adenocarcinoma patients
Source: PubMed Central journal article supplement (PMC5707077; doi:10.18632/oncotarget.21629), 2017-10-06
Supplement: oncotarget-08-96013-s001.pdf [file oncotarget-08-96013-s001.pdf]

# Radial gradient and radial deviation radiomic features from pre-surgical CT scans are associated with survival among lung adenocarcinoma patients

## SUPPLEMENTARY MATERIALS

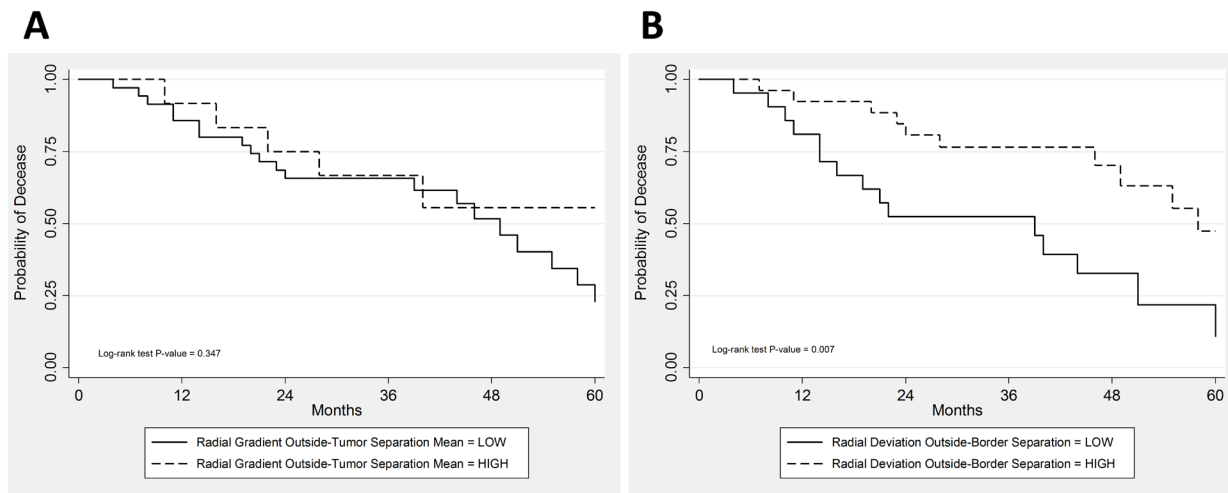

**Supplementary Figure 1: Kaplan-Meier survival curves for the features in the test cohort. (A) Radial gradient outside-tumor separation. (B) Radial deviation outside-border separation standard deviation.**

Supplementary Table 1: Log-rank p-values for the 17 features those are reproducible and non-redundant

| No. | Features                                          | Log-rank P-value |
|-----|---------------------------------------------------|------------------|
| 2   | Radial deviation tumor SD                         | 0.0706           |
| 5   | Radial deviation tumor mean (2D)                  | 0.7045           |
| 7   | Radial gradient tumor mean (2D)                   | 0.6970           |
| 8   | Radial gradient tumor SD (2D)                     | 0.6728           |
| 12  | Radial gradient core SD                           | 0.9490           |
| 20  | Radial gradient border SD                         | 0.0838           |
| 21  | Radial deviation border mean (2D)                 | 0.8747           |
| 29  | Radial deviation outside mean (2D)                | 0.9802           |
| 30  | Radial deviation outside SD (2D)                  | 0.1111           |
| 32  | Radial gradient outside SD (2D)                   | 0.8253           |
| 33  | Radial deviation outside-tumor separation mean    | 0.3217           |
| 34  | Radial deviation outside-tumor separation SD      | 0.6462           |
| 35  | Radial gradient outside-tumor separation mean     | 0.0608           |
| 36  | Radial gradient outside-tumor separation SD       | 0.7110           |
| 41  | Radial deviation outside-border separation mean   | 0.3217           |
| 42  | Radial deviation outside-border separation SD     | <b>0.0090</b>    |
| 48  | Radial gradient outside-border separation SD (2D) | <b>0.0292</b>    |

Supplementary Table 2: 5-year survival rates for the image features<sup>1</sup>

|                                                                     | 5-year survival rate | Log-rank P-value |
|---------------------------------------------------------------------|----------------------|------------------|
| <b>Five features in the training cohort</b>                         |                      |                  |
| <b>Figure 1a. Radial gradient border standard deviation</b>         |                      | 0.084            |
| High                                                                | 42.2%                |                  |
| Low                                                                 | 60.2%                |                  |
| <b>Figure 1b. Radial gradient outside-tumor separation mean</b>     |                      | 0.061            |
| High                                                                | 65.3%                |                  |
| Low                                                                 | 37.4%                |                  |
| <b>Figure 1c. Radial deviation outside-border separation SD</b>     |                      | <b>0.009</b>     |
| High                                                                | 67.7%                |                  |
| Low                                                                 | 34.9%                |                  |
| <b>Figure 1d. Radial gradient outside-border separation SD (2D)</b> |                      | <b>0.029</b>     |
| High                                                                | 63.8%                |                  |
| Low                                                                 | 38.9%                |                  |
| <b>Figure 1e. Radial deviation tumor SD</b>                         |                      | 0.071            |
| High                                                                | 40.8%                |                  |
| Low                                                                 | 62.4%                |                  |
| <b>Combinatorial Features</b>                                       |                      |                  |
| <b>Figure 1f. Training cohort</b>                                   |                      | <b>&lt;0.001</b> |
| High/High                                                           | 100.0%               |                  |
| High/Low or Low/High                                                | 50.2%                |                  |
| Low/Low                                                             | 12.1%                |                  |
| <b>Figure 1g. Test cohort</b>                                       |                      | <b>0.046</b>     |
| High/High                                                           | 85.7%                |                  |
| High/Low or Low/High                                                | 26.3%                |                  |
| Low/Low                                                             | 12.5%                |                  |

<sup>1</sup>Image features were dichotomized at the median value so that “High”  $\geq$  median value and “Low”  $<$  median value.

Supplementary Table 3: Demographics and imaging parameters by image features in the test cohort

| Covariate                                  | Radial gradient outside-tumor separation mean |           |              | Radial deviation outside-border separation SD |           |              |
|--------------------------------------------|-----------------------------------------------|-----------|--------------|-----------------------------------------------|-----------|--------------|
|                                            | Low                                           | High      | P- Value     | Low                                           | High      | P- Value     |
| <b>Sex, N (%)</b>                          |                                               |           |              |                                               |           |              |
| Female                                     | 17 (48.6)                                     | 5 (41.7)  | 0.747        | 8 (38.1)                                      | 14 (53.9) | 0.381        |
| Male                                       | 18 (51.4)                                     | 7 (58.3)  |              | 13 (61.9)                                     | 12 (46.1) |              |
| <b>Age, N (%)</b>                          |                                               |           |              |                                               |           |              |
| < 65                                       | 21 (60.0)                                     | 4 (33.3)  | 0.180        | 11 (52.4)                                     | 14 (53.9) | 1.000        |
| ≥ 65                                       | 14 (40.0)                                     | 8 (66.7)  |              | 10 (47.6)                                     | 12 (46.1) |              |
| <b>Stage, N (%)</b>                        |                                               |           |              |                                               |           |              |
| I/II                                       | 25 (71.4)                                     | 7 (58.3)  | 0.481        | 11 (52.4)                                     | 21 (80.8) | 0.059        |
| III/IV                                     | 10 (28.6)                                     | 5 (41.7)  |              | 10 (47.6)                                     | 5 (19.2)  |              |
| <b>5- year survival, %</b>                 | 23.0%                                         | 55.6%     | 0.347        | 10.9%                                         | 47.4%     | <b>0.007</b> |
| <b>Voltage, KVp, N (%)</b>                 |                                               |           |              |                                               |           |              |
| 120                                        | 29 (82.9)                                     | 11 (91.7) | 0.659        | 17 (81.0)                                     | 23 (88.5) | 0.684        |
| 130 or 140                                 | 6 (17.1)                                      | 1 (8.3)   |              | 4 (19.0)                                      | 3 (11.5)  |              |
| <b>Convolution kernel, N (%)</b>           |                                               |           |              |                                               |           |              |
| <i>A, B</i>                                | 18 (51.4)                                     | 5 (41.7)  | 0.905        | 9 (42.9)                                      | 14 (53.8) | 0.877        |
| <i>B30s, B60f, B70s</i>                    | 4 (11.4)                                      | 1 (8.3)   |              | 3 (14.3)                                      | 2 (7.7)   |              |
| <i>B30f</i>                                | 0 (0.0)                                       | 0(0.0)    |              | 0 (0.0)                                       | 0 (0.0)   |              |
| <i>B40f</i>                                | 10 (28.6)                                     | 5 (41.7)  |              | 7 (33.3)                                      | 8 (30.8)  |              |
| <i>B41f</i>                                | 0 (0.0)                                       | 0(0.0)    |              | 0(0.0)                                        | 0(0.0)    |              |
| <i>Other</i>                               | 3 (8.6)                                       | 1 (8.3)   |              | 2 (9.5)                                       | 2 (7.7)   |              |
| <b>Interpolated slice thickness, N (%)</b> |                                               |           |              |                                               |           |              |
| 1.5 mm                                     | 2 (5.7)                                       | 0 (0.0)   | 0.219        | 2 (9.5)                                       | 0 (0.0)   | 0.381        |
| 2.0 mm                                     | 12 (34.3)                                     | 1 (8.3)   |              | 7 (33.3)                                      | 6 (23.1)  |              |
| 2.5 mm                                     | 19 (54.3)                                     | 10 (83.4) |              | 11 (52.4)                                     | 18 (69.2) |              |
| 3.0 mm                                     | 2 (5.7)                                       | 1 (8.3)   |              | 1 (4.8)                                       | 2 (7.7)   |              |
| <b>Pixel resolution, tertiles N (%)</b>    |                                               |           |              |                                               |           |              |
| < 0.6926                                   | 3 (8.6)                                       | 3 (25.0)  | <b>0.010</b> | 2 (9.5)                                       | 4 (15.4)  | 0.877        |
| ≥ 0.6926 and < 0.7785                      | 1 (2.9)                                       | 3 (25.0)  |              | 2 (9.5)                                       | 2 (7.7)   |              |
| ≥ 0.7785                                   | 31 (88.5)                                     | 6 (50.0)  |              | 17 (81.0)                                     | 20 (76.9) |              |

Numbers inside parenthesis are the percentage values.

Supplementary Table 4: Radial gradient and radial deviation imaging features

| No. |   | Features                                                 |
|-----|---|----------------------------------------------------------|
| 1   | C | Radial deviation tumor mean                              |
| 2   | F | <b>Radial deviation tumor SD</b>                         |
| 3   | C | Radial gradient tumor mean                               |
| 4   | C | Radial gradient tumor SD                                 |
| 5   | F | <b>Radial deviation tumor mean (2D)</b>                  |
| 6   | R | Radial deviation tumor SD (2D)                           |
| 7   | F | <b>Radial gradient tumor mean (2D)</b>                   |
| 8   | F | <b>Radial gradient tumor SD (2D)</b>                     |
| 9   | R | Radial deviation core mean                               |
| 10  | R | Radial deviation core SD                                 |
| 11  | R | Radial gradient core mean                                |
| 12  | F | <b>Radial gradient core SD</b>                           |
| 13  | R | Radial deviation core mean (2D)                          |
| 14  | R | Radial deviation core SD (2D)                            |
| 15  | R | Radial gradient core mean (2D)                           |
| 16  | R | Radial gradient core SD (2D)                             |
| 17  | C | Radial deviation border mean                             |
| 18  | C | Radial deviation border SD                               |
| 19  | C | Radial gradient border mean                              |
| 20  | F | <b>Radial gradient border SD</b>                         |
| 21  | F | <b>Radial deviation border mean (2D)</b>                 |
| 22  | R | Radial deviation border SD (2D)                          |
| 23  | C | Radial gradient border mean (2D)                         |
| 24  | R | Radial gradient border SD (2D)                           |
| 25  | C | Radial deviation outside mean                            |
| 26  | C | Radial deviation outside SD                              |
| 27  | C | Radial gradient outside mean                             |
| 28  | C | Radial gradient outside SD                               |
| 29  | F | <b>Radial deviation outside mean (2D)</b>                |
| 30  | F | <b>Radial deviation outside SD (2D)</b>                  |
| 31  | C | Radial gradient outside mean (2D)                        |
| 32  | F | <b>Radial gradient outside SD (2D)</b>                   |
| 33  | F | <b>Radial deviation outside-tumor separation mean</b>    |
| 34  | F | <b>Radial deviation outside-tumor separation SD</b>      |
| 35  | F | <b>Radial gradient outside-tumor separation mean</b>     |
| 36  | F | <b>Radial gradient outside-tumor separation SD</b>       |
| 37  | R | Radial deviation outside-tumor separation mean (2D)      |
| 38  | R | Radial deviation outside-tumor separation SD (2D)        |
| 39  | R | Radial gradient outside-tumor separation mean (2D)       |
| 40  | C | Radial gradient outside-tumor separation SD (2D)         |
| 41  | F | <b>Radial deviation outside-border separation mean</b>   |
| 42  | F | <b>Radial deviation outside-border separation SD</b>     |
| 43  | C | Radial gradient outside-border separation mean           |
| 44  | C | Radial gradient outside-border separation SD             |
| 45  | R | Radial deviation outside-border separation mean (2D)     |
| 46  | R | Radial deviation outside-border separation SD (2D)       |
| 47  | C | Radial gradient outside-border separation mean (2D)      |
| 48  | F | <b>Radial gradient outside-border separation SD (2D)</b> |

F = Final set of features that were analyzed after non-reproducible (R) features and correlated features (C) were removed.

Supplementary Table 5: Semantic features analyzed

| No. | Features                         | p-value                                             |
|-----|----------------------------------|-----------------------------------------------------|
| 1   | Fissure attachment               | 0: absence 1: presence                              |
| 2   | Pleural attachment               | 0: absence 1: presence                              |
| 3   | Bubble-like lucency / cavitation | 0: absence 1: presence                              |
| 4   | Air bronchogram                  | 0: absence 1: presence                              |
| 5   | Calcification                    | 0: absence 1: presence                              |
| 6   | Attachment to vessel             | 0: absence 1: presence                              |
| 7   | Pleural retraction               | 0: absence 1: presence                              |
| 8   | Lobulation                       | 0: absence 1: presence                              |
| 9   | Spiculation                      | 0: absence 1: presence                              |
| 10  | Concavity                        | 0: absence 1: presence                              |
| 11  | Attenuation pattern <sup>1</sup> | 1: GGO <sup>2</sup> 2: part-solid 3: solid          |
| 12  | Shape                            | 1: round/oval 2: irregular                          |
| 13  | Border definition                | 1: well-defined 2: neither 1 or 3 3: poorly defined |

<sup>1</sup>None of the tumors were GG0s.

<sup>2</sup>GGO: Ground glass opacity.
